# Supplementary material for: An open-source surface barrier discharge plasma pretreatment for reduced cracking of outdoor wood coatings
Source: Springer Nature journal article supplement (doi:10.1007/s10570-021-04014-2), 2021-07-06
Supplement: MOESM1 [file 19337718]

An open-source surface barrier discharge plasma pretreatment for reduced cracking of outdoor wood coatings

S. Dahle1*, M. Pilko1, J. Žigon1, R. Zaplotnik2, M. Petrič1, M. Pavlič1

1 Department of Wood Science and Technology, Biotechnical faculty, University of Ljubljana, Jamnikarjeva ulica 101, 1000 Ljubljana, Slovenia

2 Jožef Stefan Institute, Department of Surface Engineering and Optoelectronics, Jamova cesta 39, 1000 Ljubljana, Slovenia

***Corresponding author:** Sebastian Dahle, University of Ljubljana, Biotechnical Faculty, Department of Wood Science and Technology, Jamnikarjeva ulica 101, 1000 Ljubljana, Slovenia [e-mail: [sebastian.dahle@bf.uni–lj.si](mailto:sebastian.dahle@bf.uni–lj.si)]

Supplemental material

The development of a simple surface barrier discharge plasma device is presented to enable more widespread access to and utilization of plasma technology. The application of the plasma device was demonstrated for pretreatments to protective wood coatings for outdoor usage. The coatings' overall performance was increased, showing a reduction or absence of cracking due to weathering on plasma-pretreated specimens. Moreover, after ten months of outdoor weathering, the plasma-pretreated specimens showed fewer infections with biotic factors and improved adhesion performance in cross-cut tests, while the surface gloss performed independently from plasma pretreatments. In contrast to that, plasma-pretreated specimens were slightly more prone to discoloration due to outdoor weathering, whereas the plasma pretreatments did not impact the initial color after coating application.

# Electrical schematics


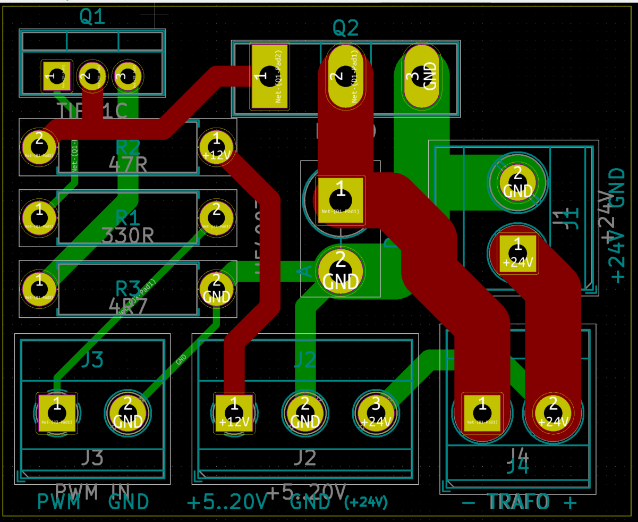


Figure S1.1: Flyback driver circuit schematic (left) and PCB layout (right)


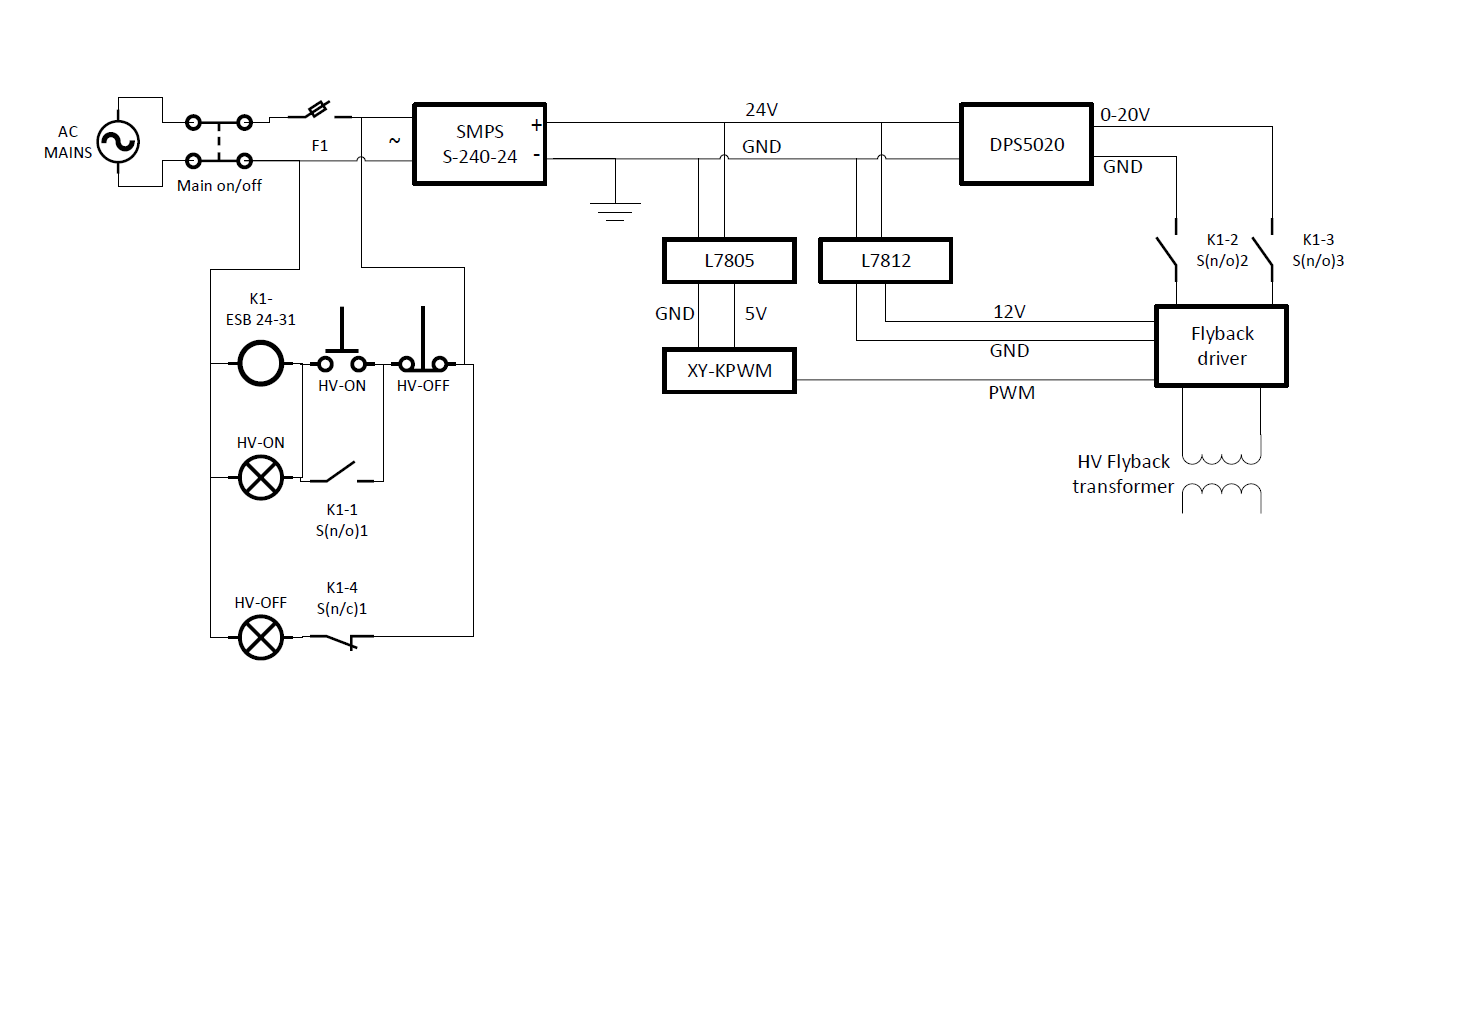


Figure S1.2: Electrical schematics of the HV power supply.

# Mean air temperature

The weather and climate data was obtained from the Archive of the National Meteorological Service of Slovenia, Slovenian Environmental Agency, Ministry of the Environment and Spatial Planning [[[1]](#endnote-1)].


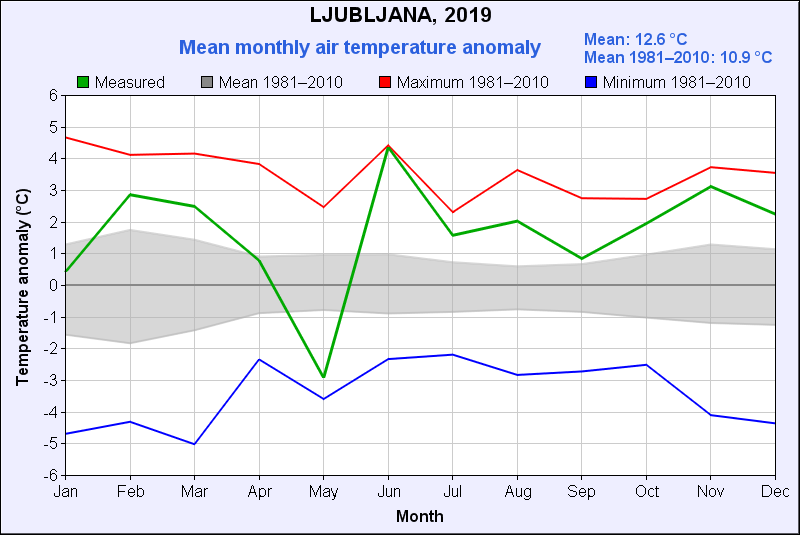


Figure S2.1: Mean monthly air temperature 2019


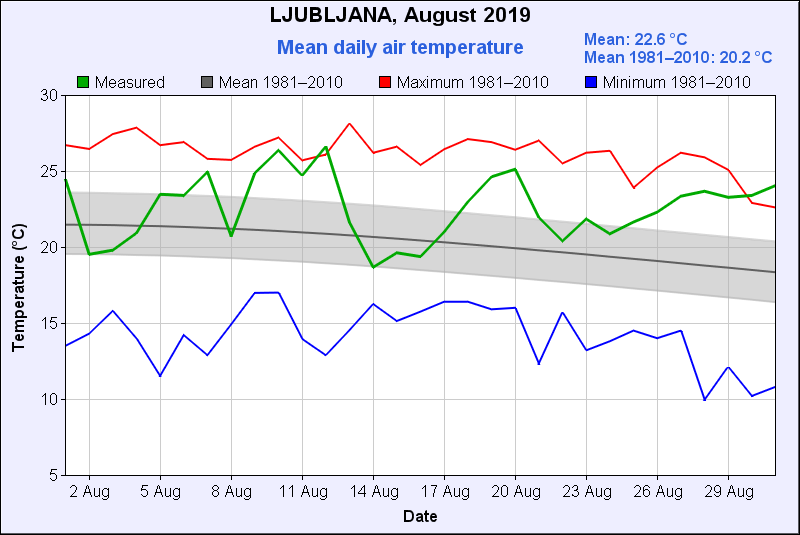


Figure S2.2: Mean daily air temperature August 2019


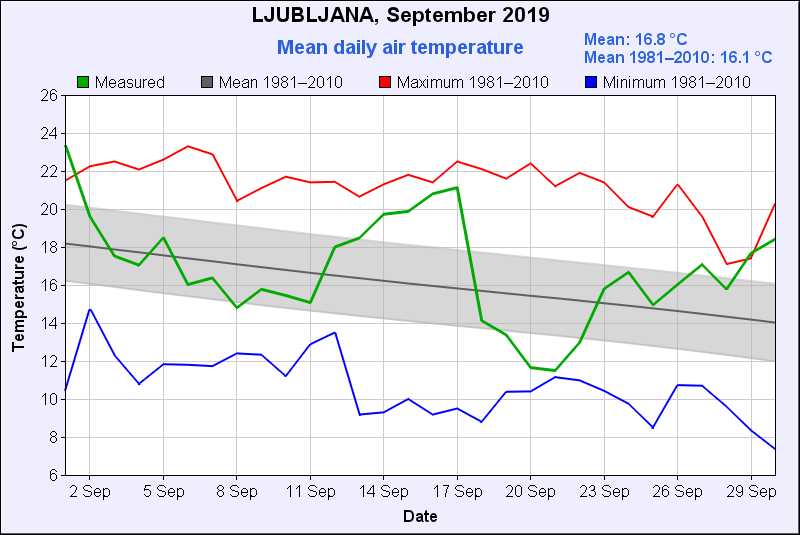


Figure S2.3: Mean daily air temperature September 2019


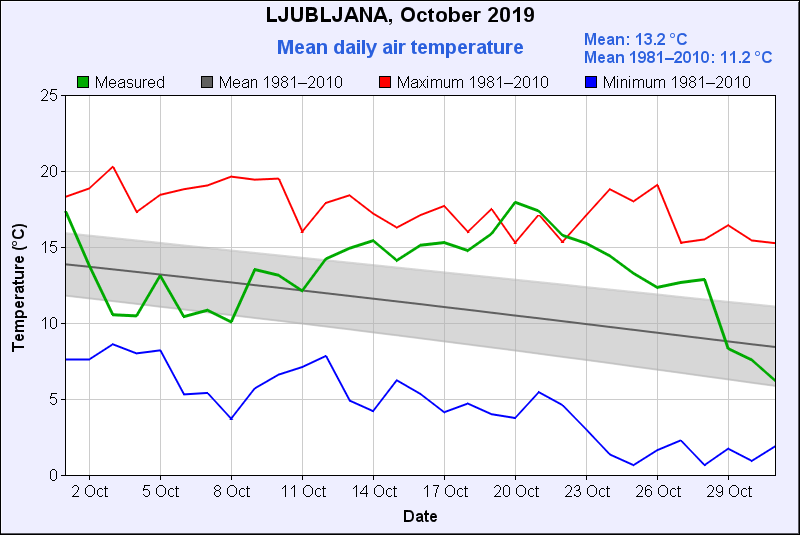


Figure S2.4: Mean daily air temperature October 2019


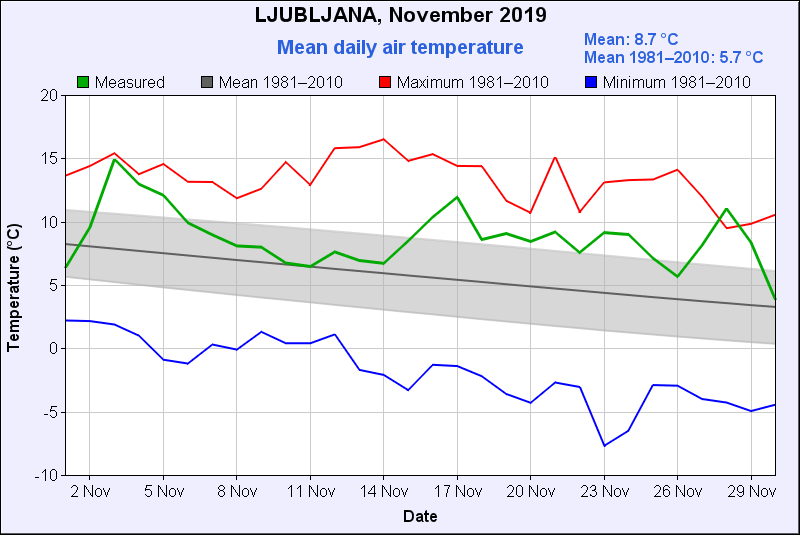


Figure S2.5: Mean daily air temperature November 2019


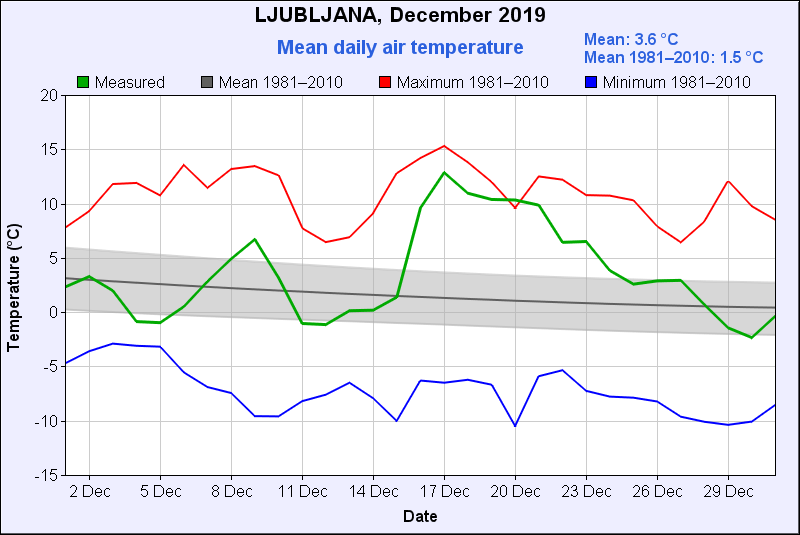


Figure S2.6: Mean daily air temperature December 2019


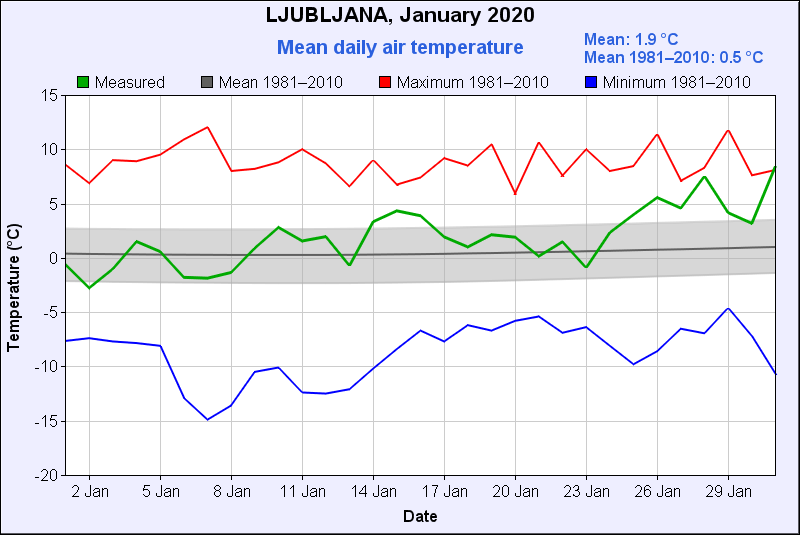


Figure S2.7: Mean daily air temperature January 2020


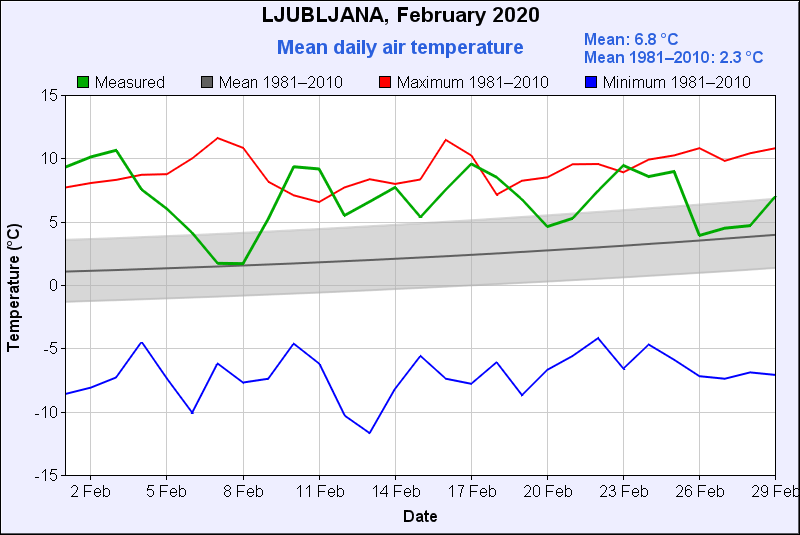


Figure S2.8: Mean daily air temperature February 2020


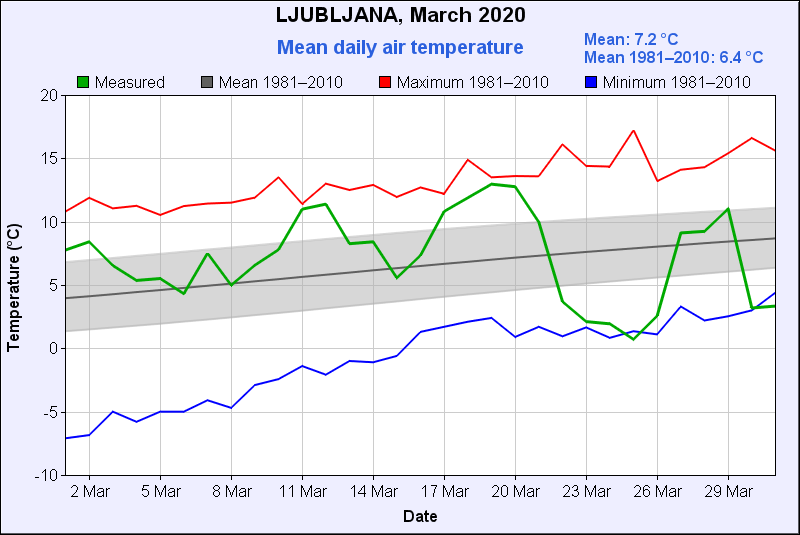


Figure S2.9: Mean daily air temperature March 2020


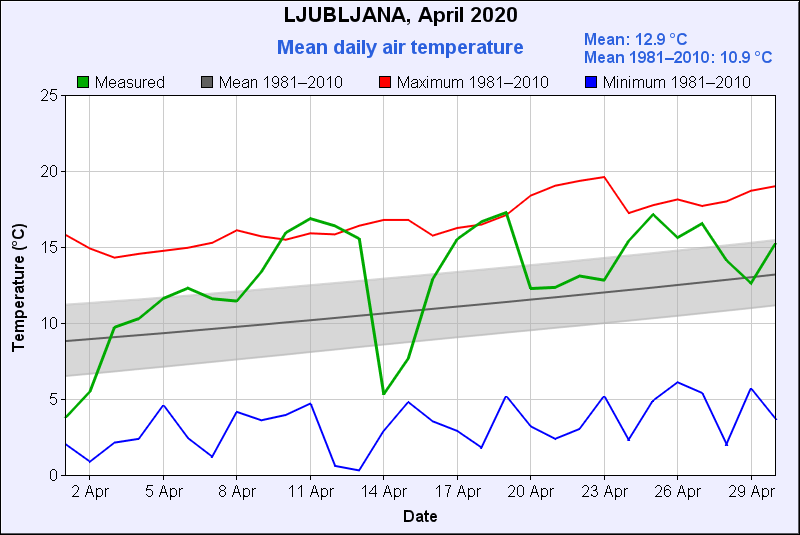


Figure S2.10: Mean daily air temperature April 2020


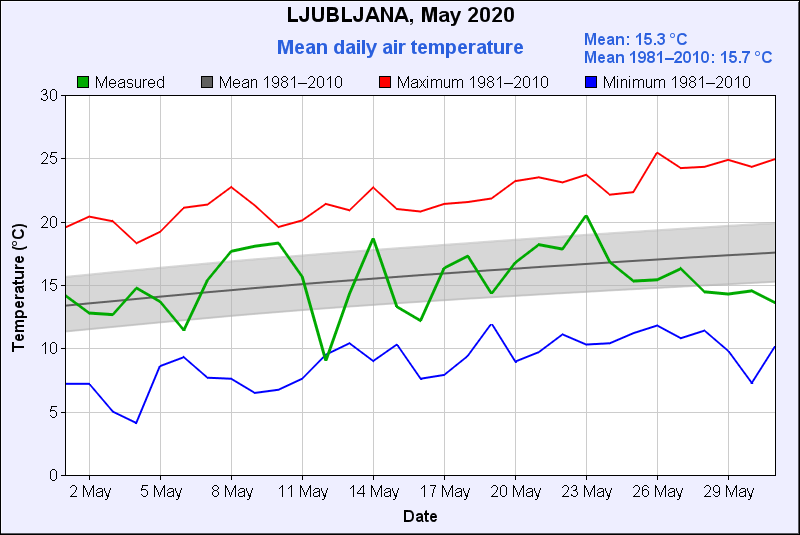


Figure S2.11: Mean daily air temperature May 2020


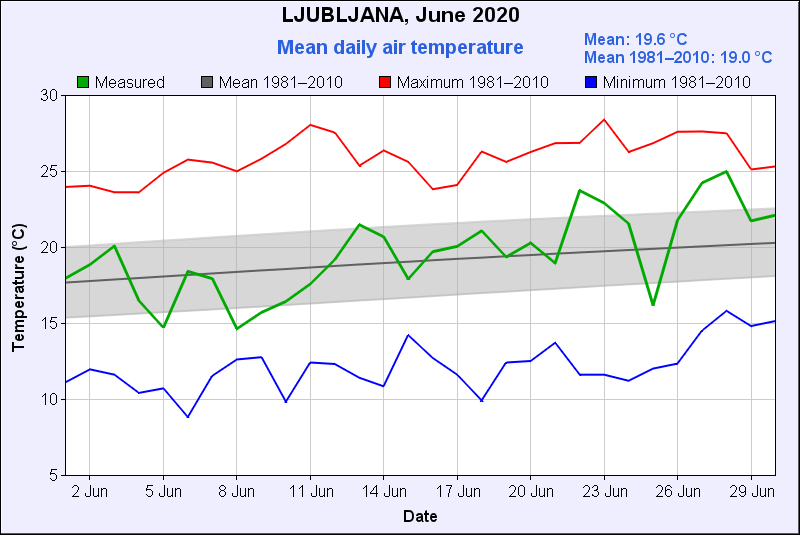


Figure S2.12: Mean daily air temperature June 2020

# Temperature extremes


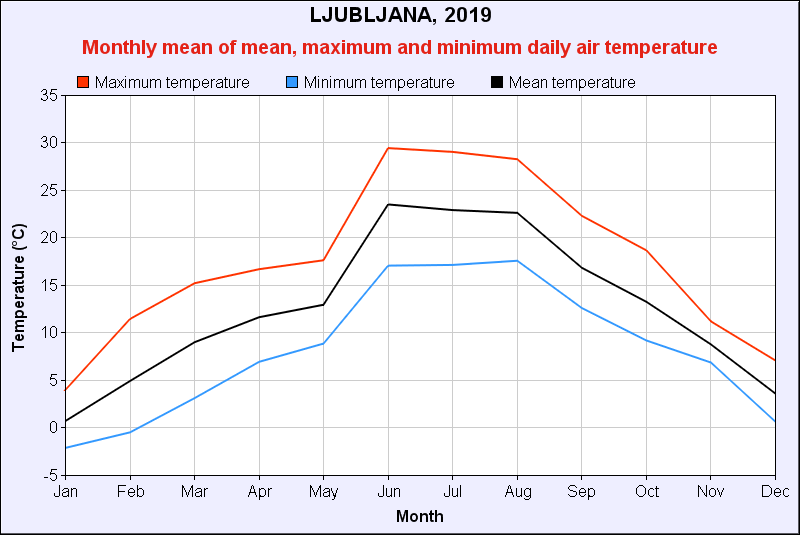


Figure S3.1: Monthly mean, maximum and minimum daily air temperatures 2019


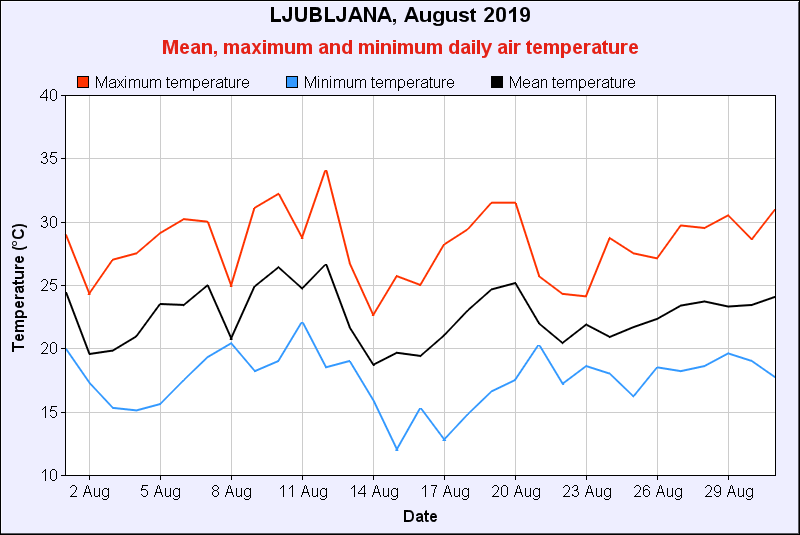


Figure S3.2: Mean, maximum and minimum daily air temperatures August 2019


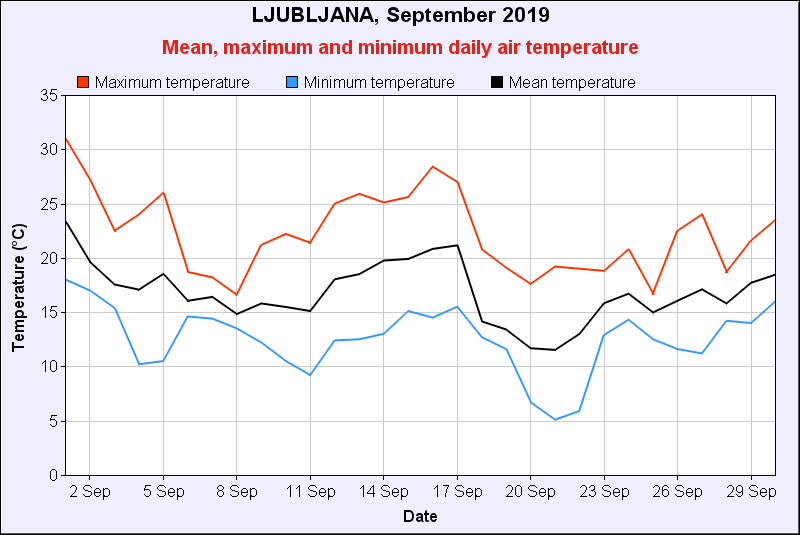


Figure S3.3: Mean, maximum and minimum daily air temperatures September 2019


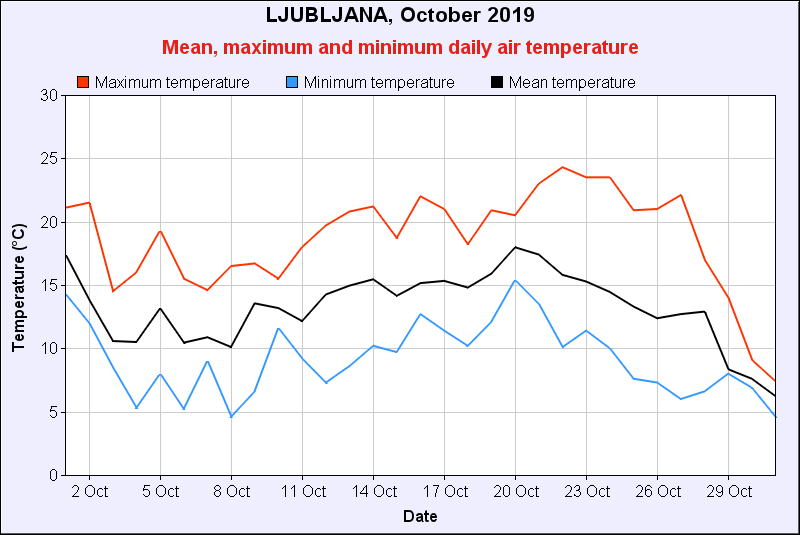


Figure S3.4: Mean, maximum and minimum daily air temperatures October 2019


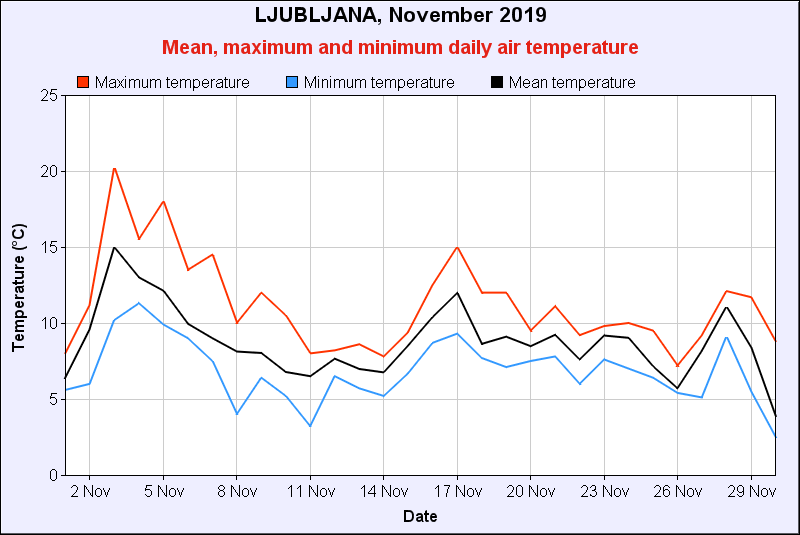


Figure S3.5: Mean, maximum and minimum daily air temperatures November 2019


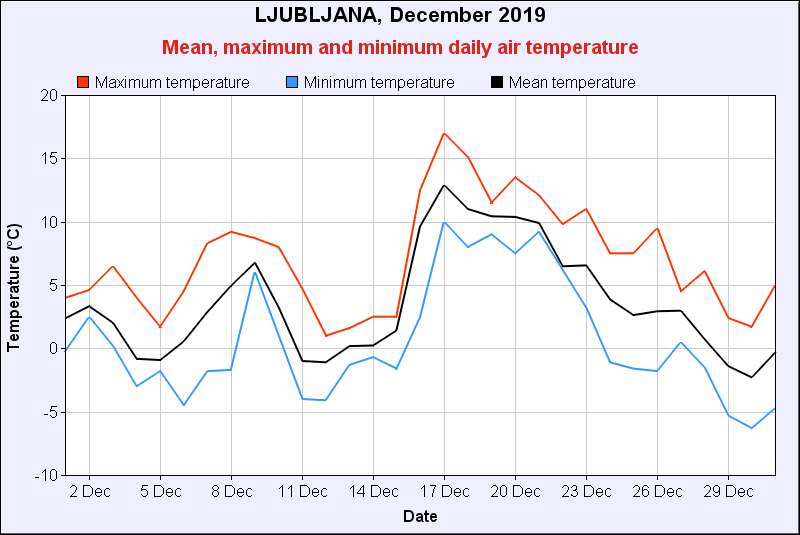


Figure S3.6: Mean, maximum and minimum daily air temperatures December 2019


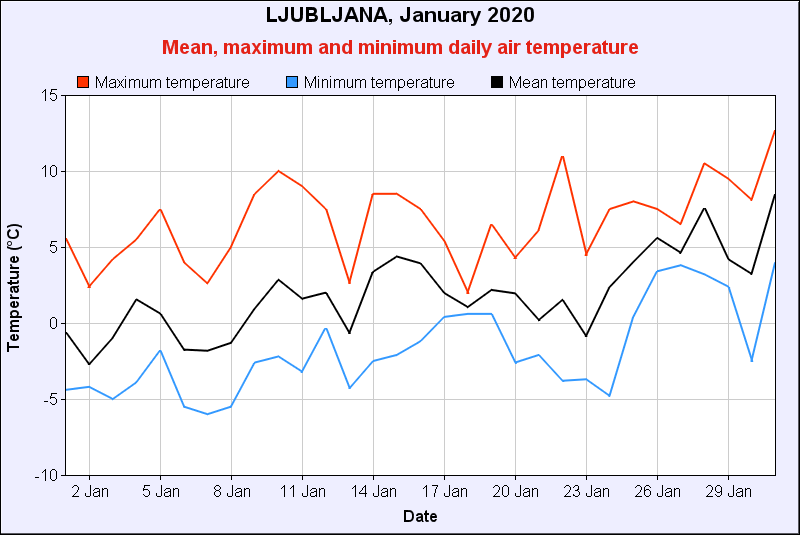


Figure S3.7: Mean, maximum and minimum daily air temperatures January 2020


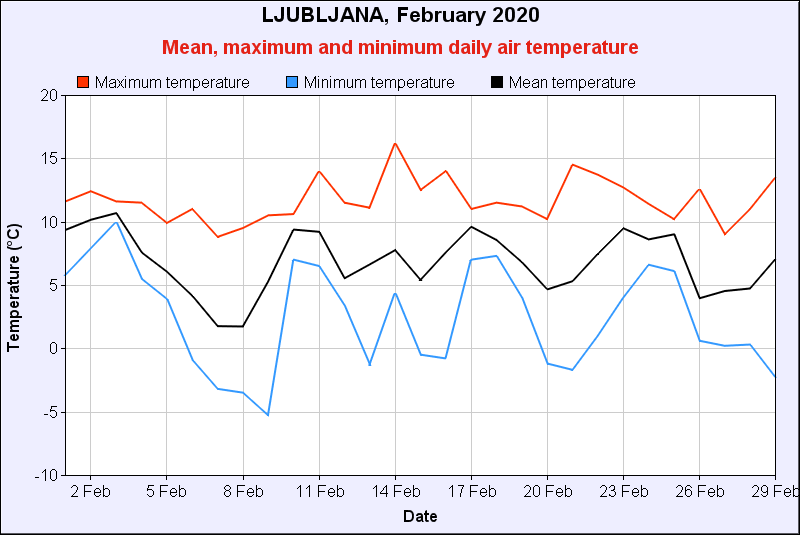


Figure S3.8: Mean, maximum and minimum daily air temperatures February 2020


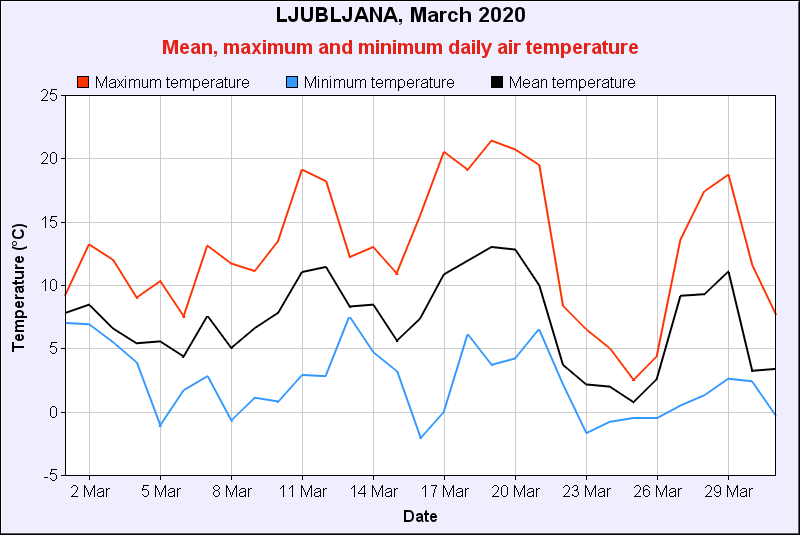


Figure S3.9: Mean, maximum and minimum daily air temperatures March 2020


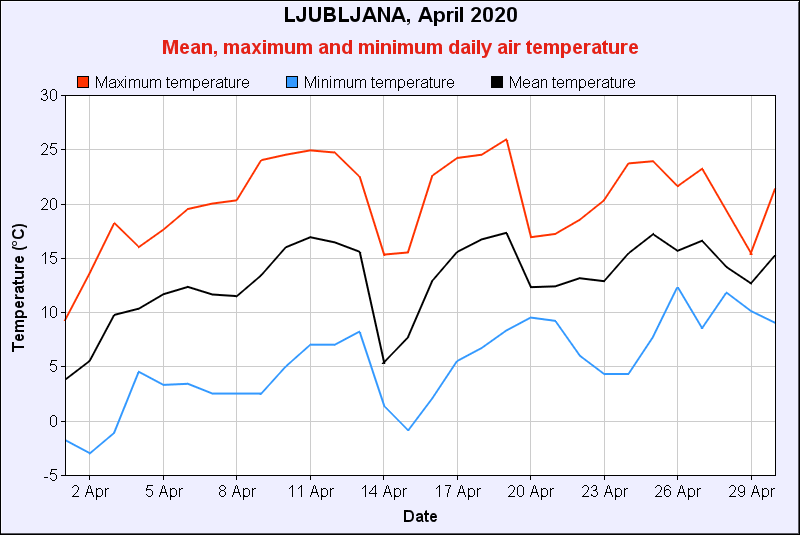


Figure S3.10: Mean, maximum and minimum daily air temperatures April 2020


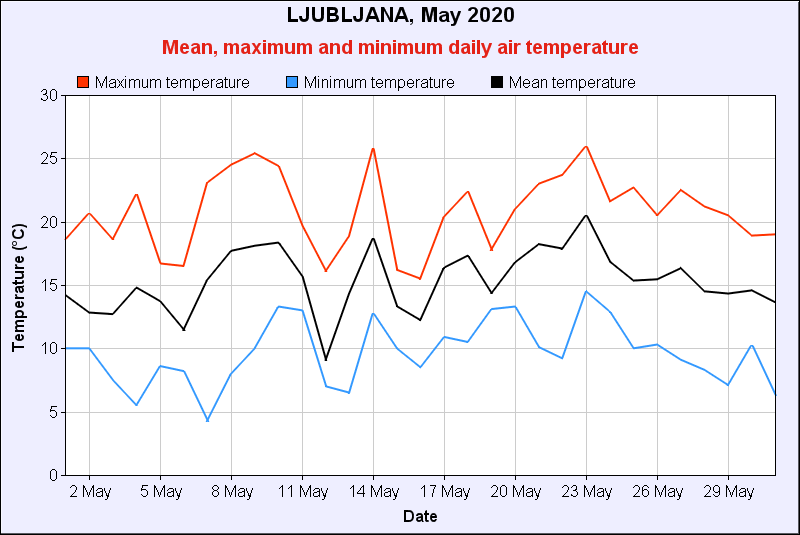


Figure S3.11: Mean, maximum and minimum daily air temperatures May 2020


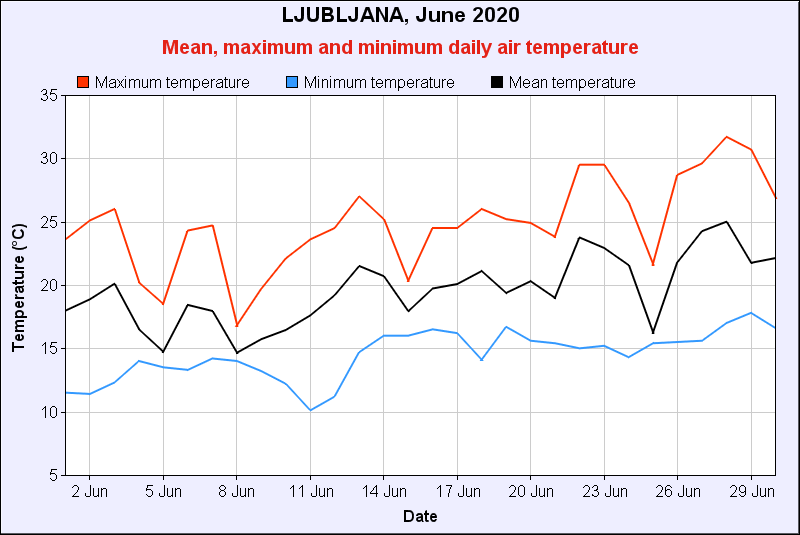


Figure S3.12: Mean, maximum and minimum daily air temperatures June 2020

# Precipitation sums


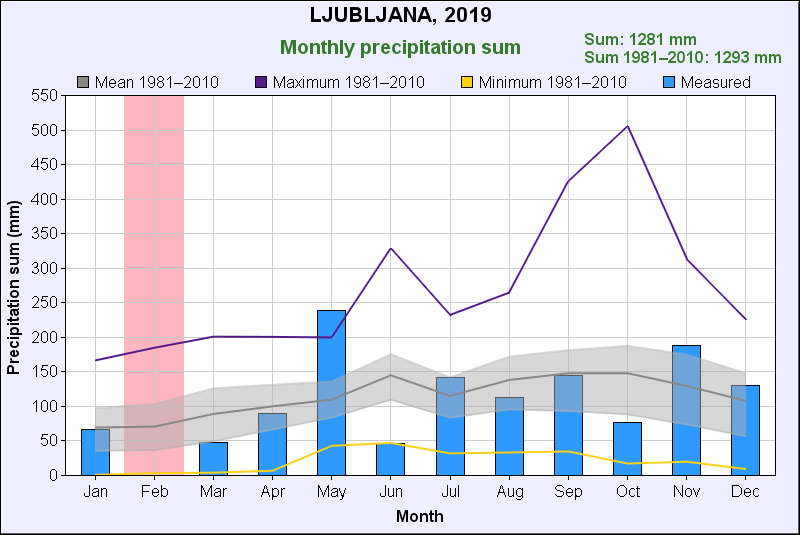


Figure S4.1: Monthly precipitation sums 2019


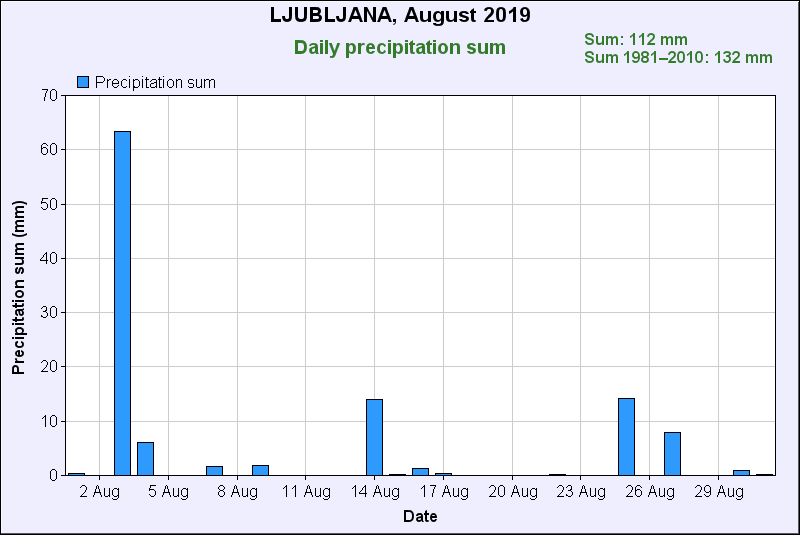


Figure S4.2: Daily precipitation sums August 2019


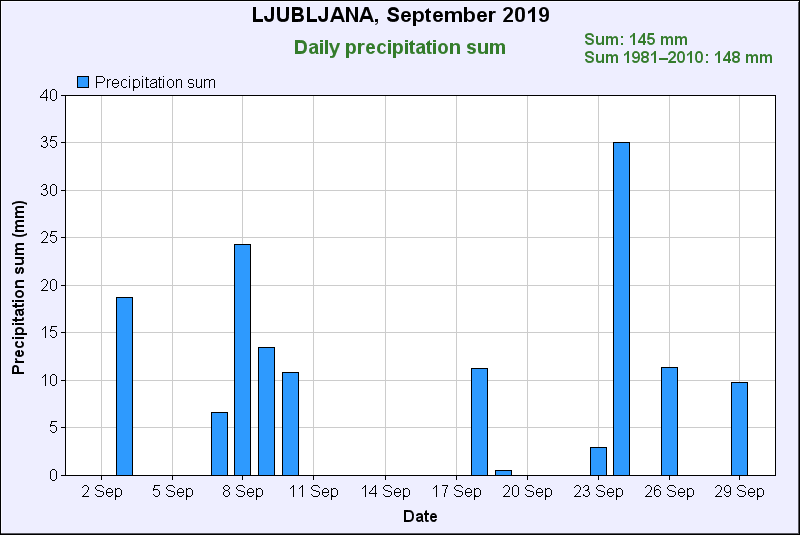


Figure S4.3: Daily precipitation sums September 2019


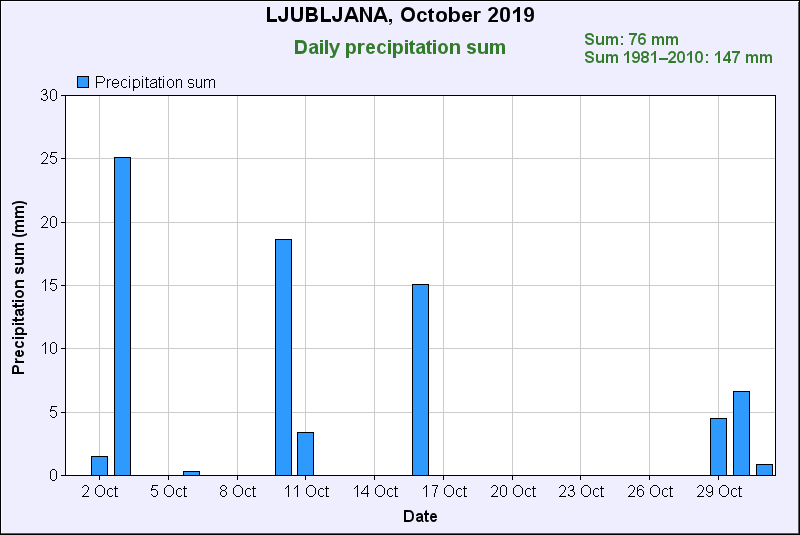


Figure S4.4: Daily precipitation sums October 2019


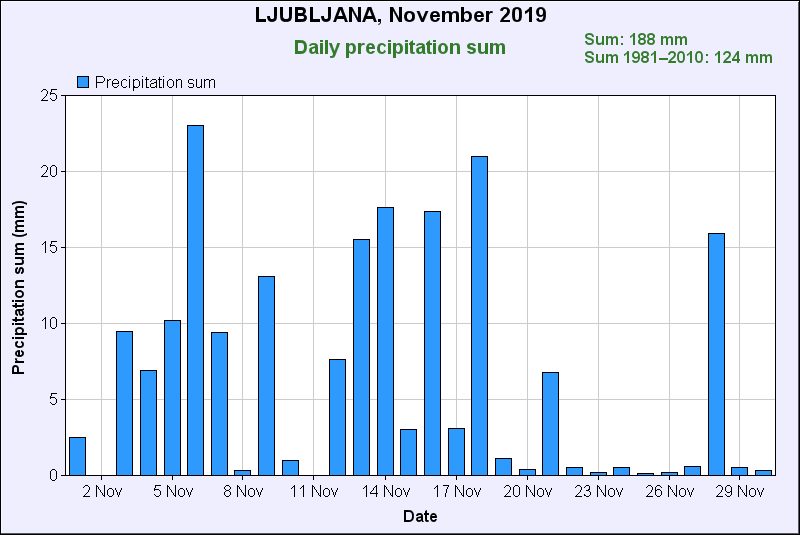


Figure S4.5: Daily precipitation sums November 2019


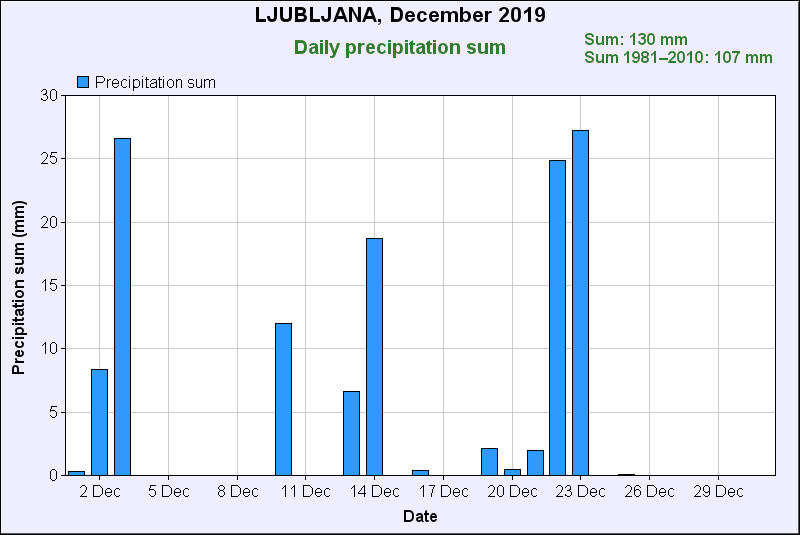


Figure S4.6: Daily precipitation sums December 2019


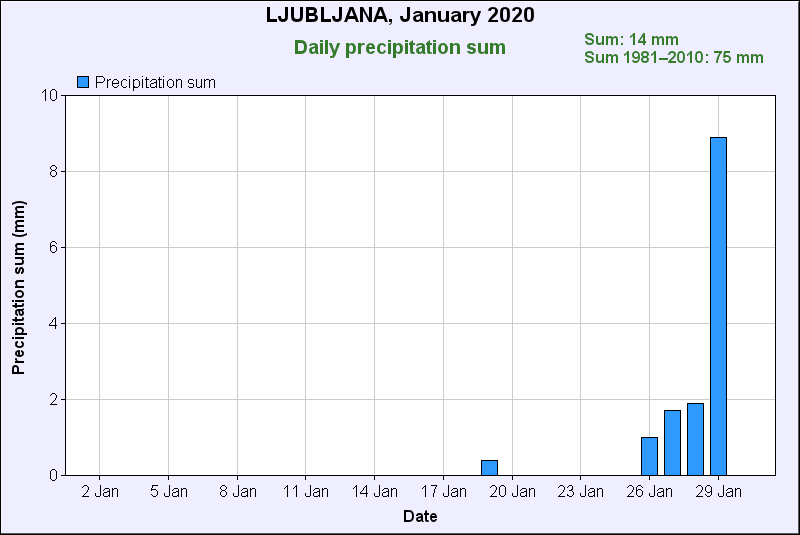


Figure S4.7: Daily precipitation sums January 2020


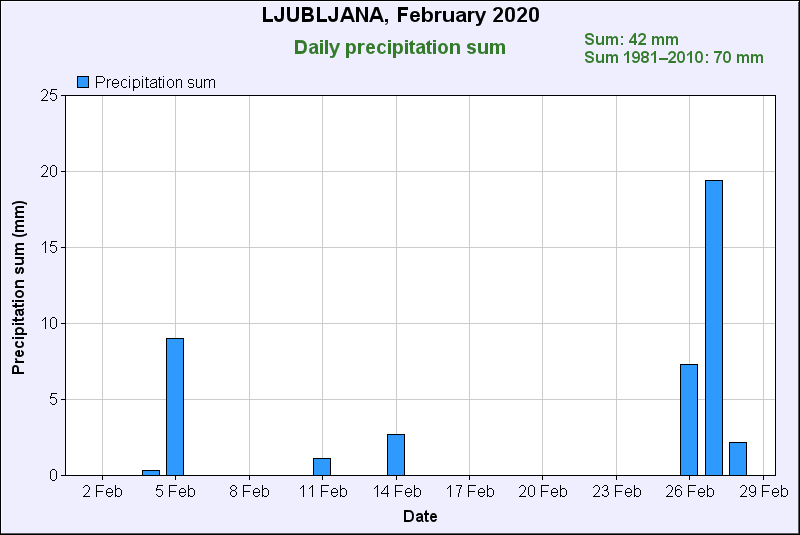


Figure S4.8: Daily precipitation sums February 2020


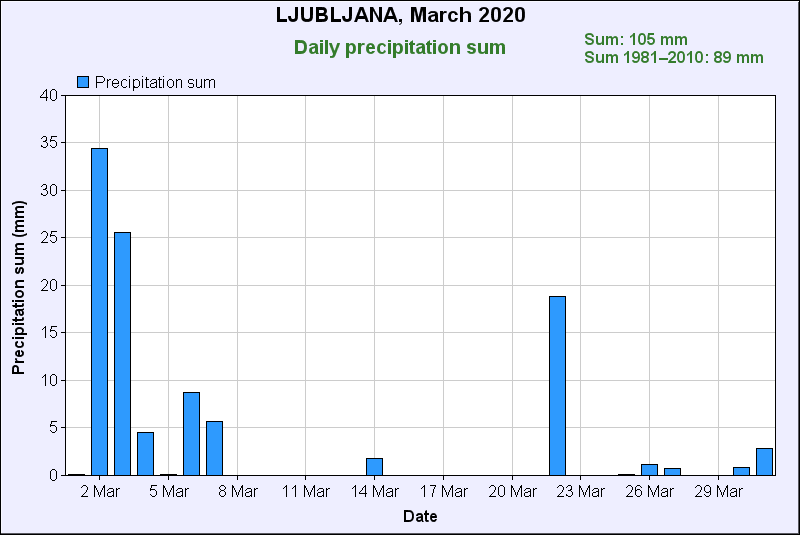


Figure S4.9: Daily precipitation sums March 2020


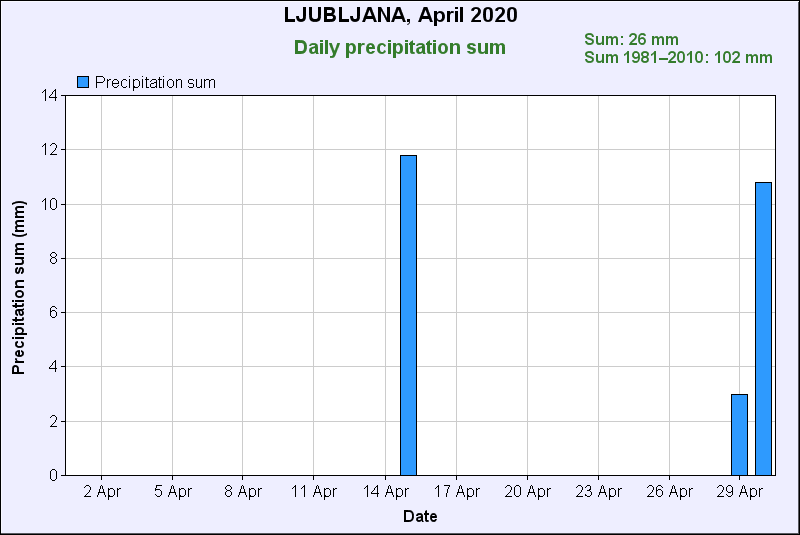


Figure S4.10: Daily precipitation sums April 2020


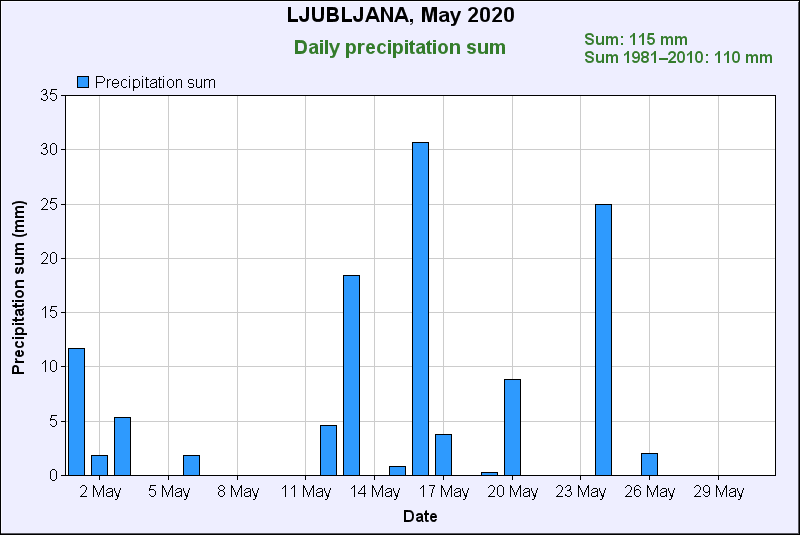


Figure S4.11: Daily precipitation sums May 2020


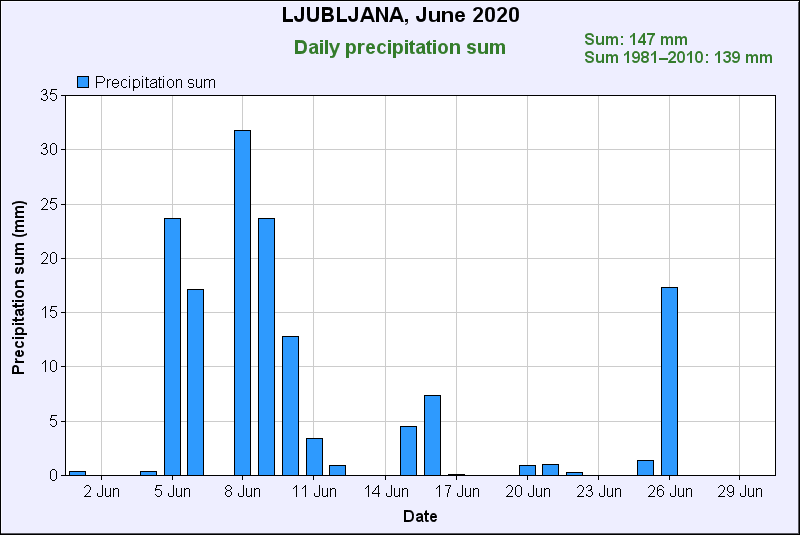


Figure S4.12: Daily precipitation sums June 2020

# Sunshine duration


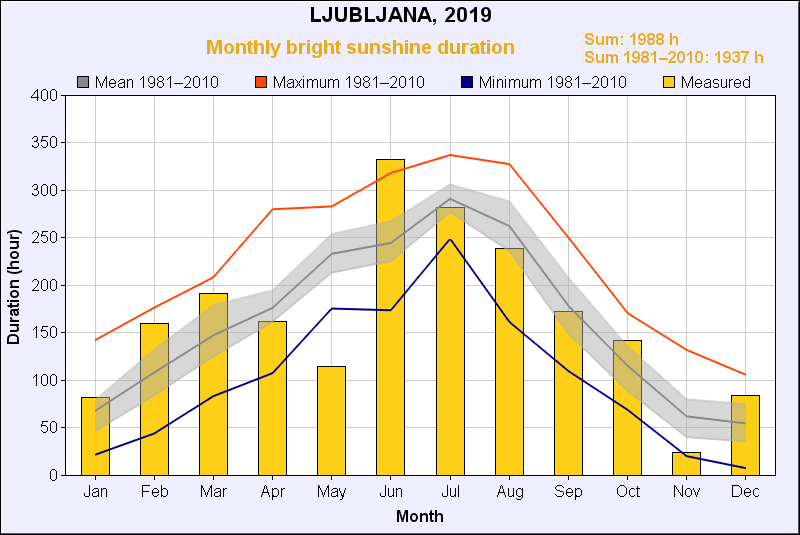


Figure S5.1: Monthly bright sunshine duration 2019


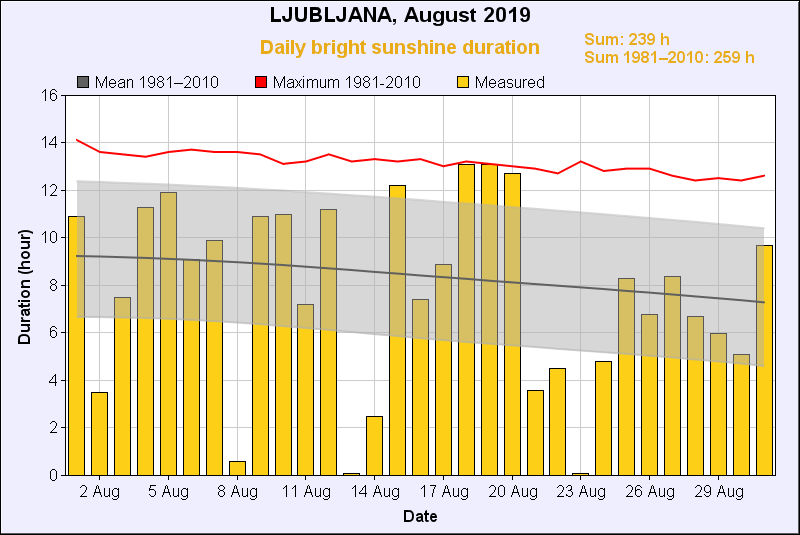


Figure S5.2: Daily bright sunshine duration August 2019


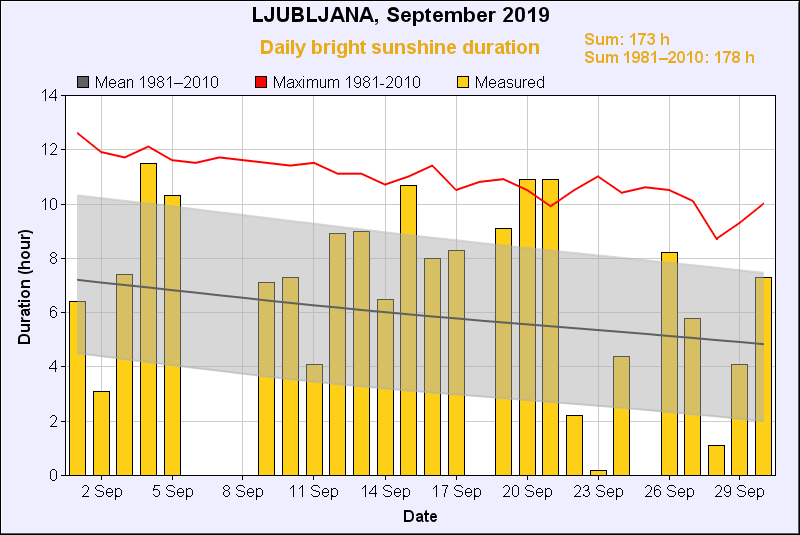


Figure S5.3: Daily bright sunshine duration September 2019


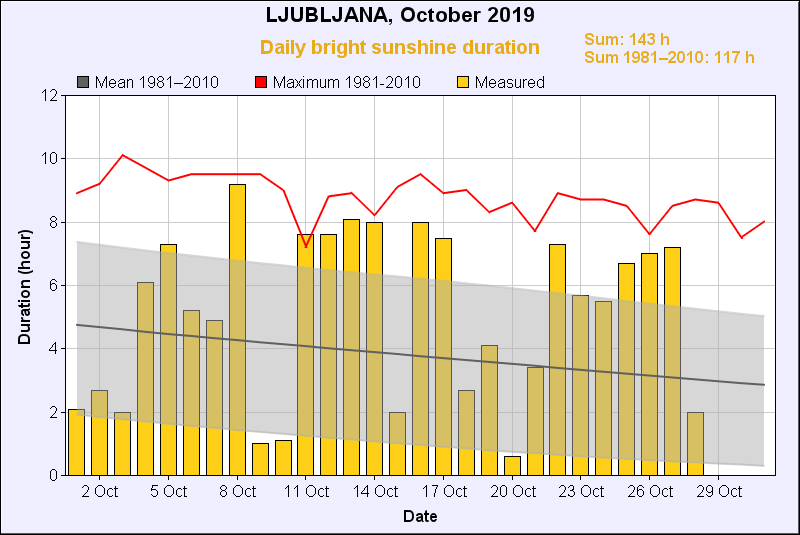


Figure S5.4: Daily bright sunshine duration October 2019


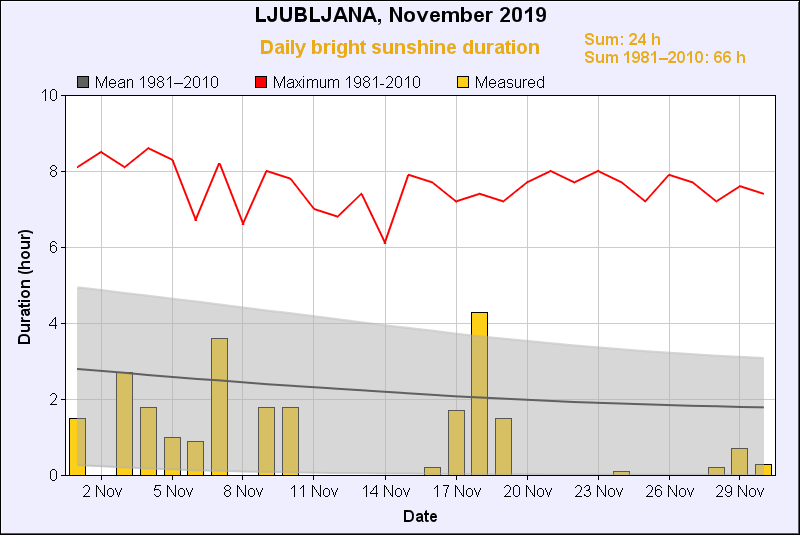


Figure S5.5: Daily bright sunshine duration November 2019


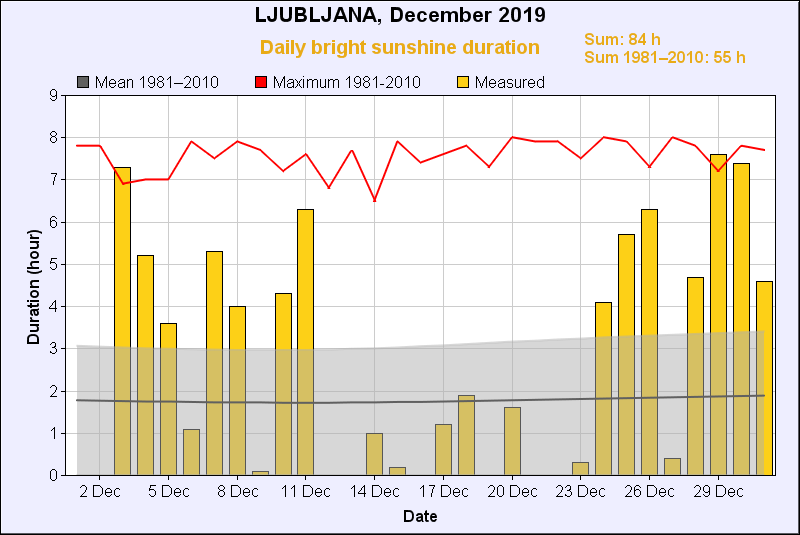


Figure S5.6: Daily bright sunshine duration December 2019


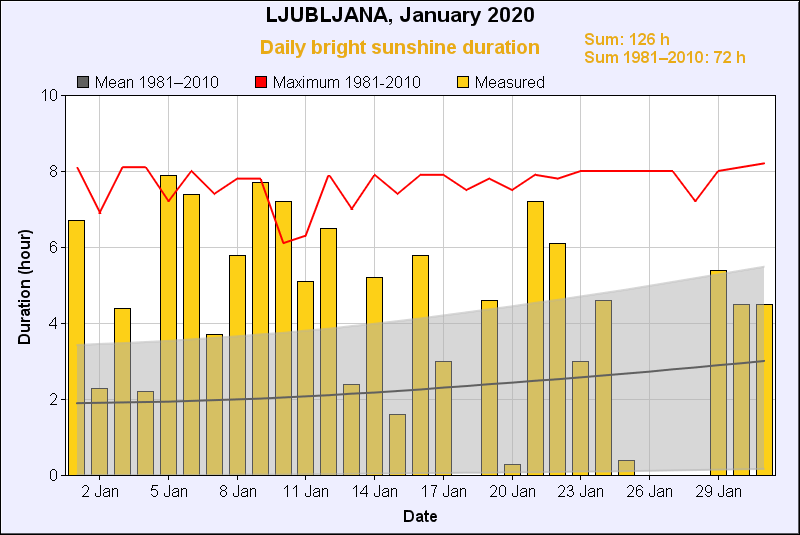


Figure S5.7: Daily bright sunshine duration January 2020


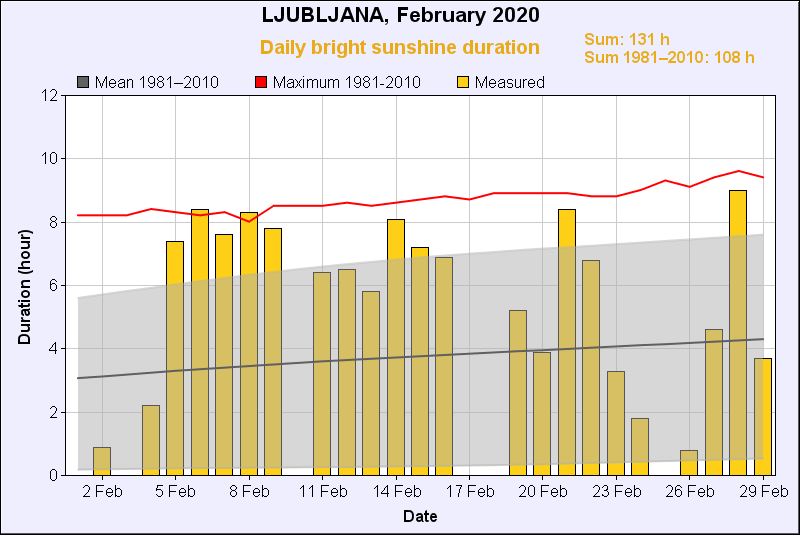


Figure S5.8: Daily bright sunshine duration February 2020


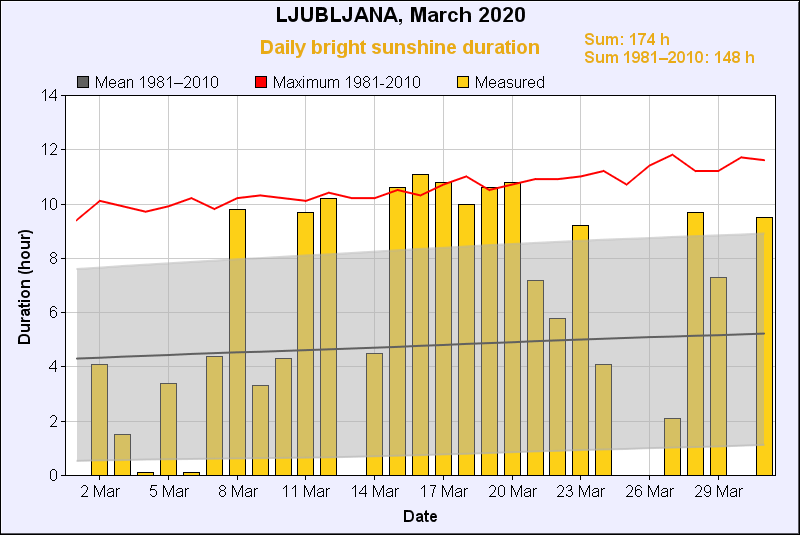


Figure S5.9: Daily bright sunshine duration March 2020


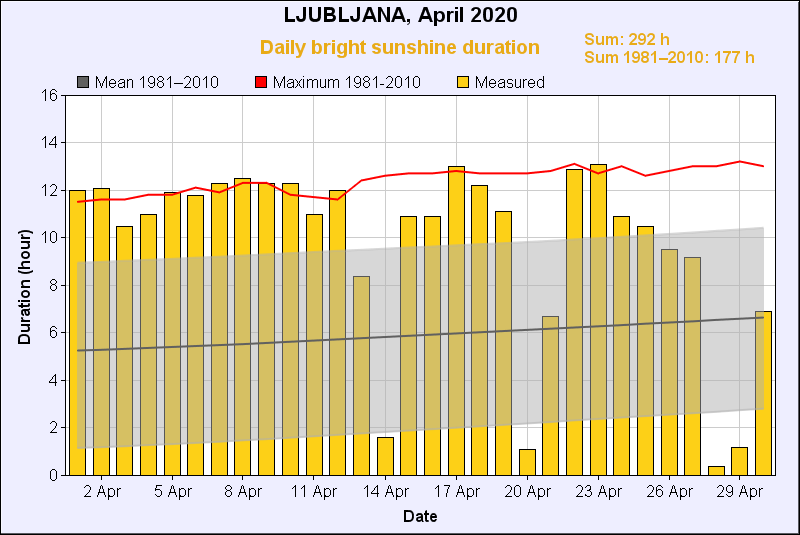


Figure S5.10: Daily bright sunshine duration April 2020


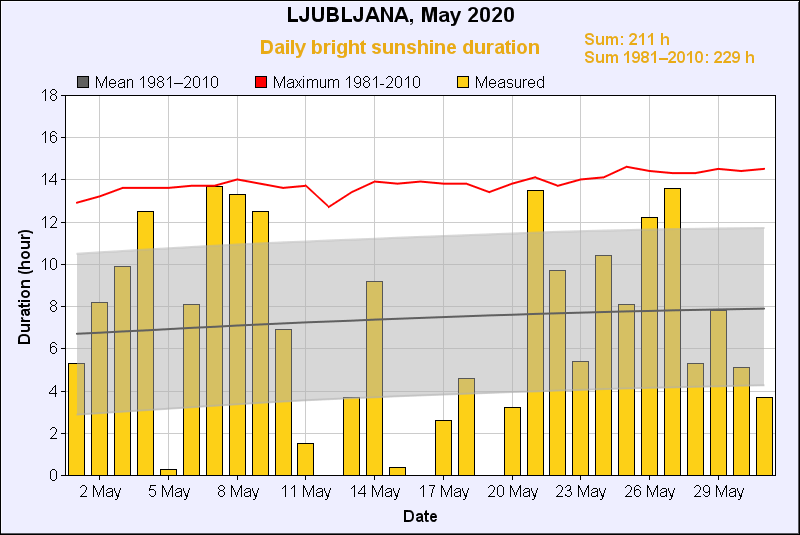


Figure S5.11: Daily bright sunshine duration May 2020


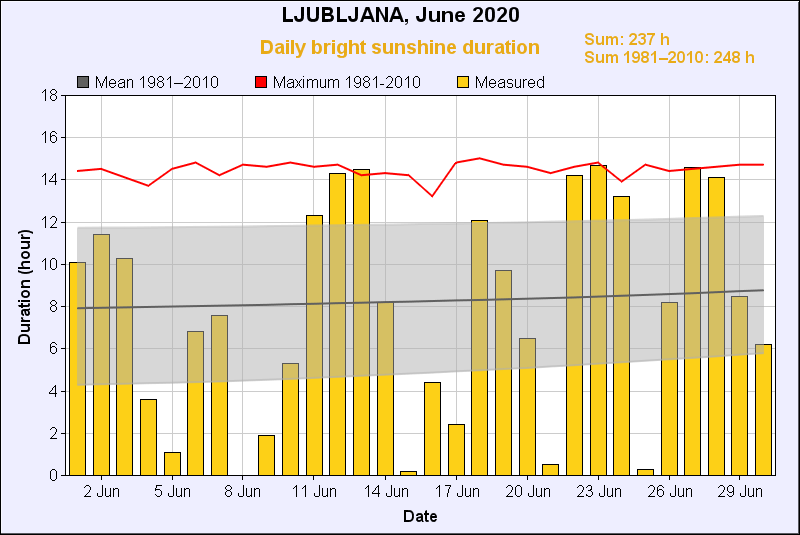


Figure S5.12: Daily bright sunshine duration June 2020

1. [] National Meteorological Service of Slovenia – Archiv. <http://meteo.arso.gov.si/met/en/climate/current/last-12-months/archive/> , 2020 (accessed 6 November 2020). [↑](#endnote-ref-1)
